# Supplementary material
Source: MDPI journal article supplement (https://www.mdpi.com/2071-1050/14/10/6089)
Supplement: s1 [file s1]

# **Risk assessment of mining environmental liabilities for their categorization and prioritization in gold mining areas of Ecuador**

**Bryan Salgado-Almeida<sup>1</sup>, Daniel Falqu  z-Torres<sup>1</sup>, Paola Romero-Crespo<sup>1</sup>, Priscila Valverde-Armas<sup>1</sup>, Fredy Guzm  n-Mart  nez<sup>2</sup>, and Samantha Jim  nez-Oyola<sup>1,\*</sup>**

<sup>1</sup> Escuela Superior Polit  cnica del Litoral, ESPOL, Facultad de Ingenier  a en Ciencias de la Tierra, Campus Gustavo Galindo km 30.5 v  a Perimetral, P.O. Box 09-01-5863, Guayaquil, Ecuador.

<sup>2</sup> Mexican Geological Survey, Boulevard Felipe Angeles Km. 93.50-4, 42083, Pachuca, Mexico

**\*Corresponding author:** Samantha Jim  nez-Oyola, [sjimenez@espol.edu.ec](mailto:sjimenez@espol.edu.ec)

**Supplementary material caption:**

**Table S1:** Maximum and minimum concentrations of heavy metals in water, soil, and sediment samples from each study area.

**Table S2:** Assessment criteria of parameters for probability index determination of scenario S1 and S2

**Table S3:** Assessment criteria to the severity index ( $I_s$ ) of scenario S1

**Table S4:** Assessment criteria of parameters for severity index determination of scenario S3 and S4

**Table S5:** Risk assessment results: scenarios S1 and S2

**Table S6:** Risk assessment results: scenarios S3 and S4

**Table S1:** Maximum and minimum concentrations of heavy metal(loid)s in water, soil, and sediment samples from each study area.

| Surface water (mg/L)        |                          | As            | Cd            | Cu            | Hg          | Pb            | Zn         |
|-----------------------------|--------------------------|---------------|---------------|---------------|-------------|---------------|------------|
| Macuchi                     | (min – max) <sup>a</sup> | 0.001 – 85    | 0.0001 – 4.90 | 0.01 – 1,103  | -           | 0.001 – 1.10  | 0.01 – 364 |
| Tenguel – Ponce             | (max) <sup>b</sup>       | 0.26          | 0.0001        | 0.01          | -           | 0.002         | -          |
| Enríquez                    | (max) <sup>c</sup>       | 0.47          | 0.01          | 7.28          | 0.001       | -             | 0.82       |
|                             | (max) <sup>d</sup>       | 0.02          | 0.0001        | 0.21          | 0.00002     | 0.0001        | 0.01       |
| Puyango River               | (min – max) <sup>b</sup> | 0.002 – 0.01  | 0.001 – 0.002 | 0.01 – 0.02   | -           | 0.001 – 0.003 | -          |
| Basin                       | (max) <sup>c</sup>       | -             | 0.04          | 0.44          | 0.0001      | -             | 3.35       |
|                             | (max) <sup>d</sup>       | 0.06          | 0.001         | 1.43          | 0.001       | 0.01          | 0.11       |
|                             | LMP <sup>f</sup>         | 0.05          | 0.001         | 0.02          | 0.0002      | 0.01          | 0.18       |
| Soils and Sediments (mg/kg) |                          | As            | Cd            | Cu            | Hg          | Pb            | Zn         |
| Macuchi                     | (min – max) <sup>a</sup> | 17 – 325      | 0.20 – 5.20   | 69 – 1,467    | -           | 75 – 791      | 33 – 562   |
| Tenguel – Ponce             | (min – max) <sup>b</sup> | 2,070 – 7,700 | 1.80 – 6.05   | 2,420 – 2,500 | 0.50 – 2.00 | 21.80 – 70.60 | -          |
| Enríquez                    | (max) <sup>c</sup>       | 46,049        | 24            | 9,134         | 13          | 666           | 924        |
|                             | (max) <sup>d</sup>       | 3,968         | 2.20          | 1,425         | 1.40        | 35.40         | 175        |
|                             | (min – max) <sup>e</sup> | 44 – 9,890    | -             | 56 – 5,638    | -           | -             | -          |
| Puyango River               | (min – max) <sup>b</sup> | 35 – 403      | 3.60 – 19.60  | 97.60 – 1,680 | 0.02 – 0.10 | 107 – 1,310   | -          |
| Basin                       | (max) <sup>c</sup>       | 7,493         | 104           | 8,750         | 3           | 10,524        | 9,792      |
|                             | (max) <sup>d</sup>       | 1,313         | 72.90         | 2,993         | 2.50        | 6,646         | 9,304      |
|                             | LMP <sup>f</sup>         | 5             | 0.50          | 30            | 0.10        | 25            | 60         |

min: minimum values; max: maximum values; LMP: maximum allowed limit by Ecuadorian legislation.

<sup>a</sup> MAE-PRAS [1]; <sup>b</sup> Tarras-Wahlberg et al. [2] – maximum values correspond to representative concentrations during dry season; <sup>c</sup> Appleton et al. [3]; <sup>d</sup> Carling et al. [4]; <sup>e</sup> Sierra et al. [5] and <sup>f</sup> TULSMA [6].

**Table S2:** Assessment criteria of parameters for probability index determination of scenario S1 and S2

| Scenario S1 and S2 |                                                    |                           |                                |
|--------------------|----------------------------------------------------|---------------------------|--------------------------------|
| Scenario           | Parameter                                          | Criteria                  | Value                          |
| S1                 | Proximity factor to water bodies ( $P_R$ )         | $D \leq 50$ m             | $P_R = 1.0$                    |
|                    |                                                    | $50 < D < 500$ m          | $P_R = -0.0022 \times D + 1.1$ |
|                    |                                                    | $D \geq 500$ m            | $P_R = 0.0$                    |
| S2                 | Proximity factor to residential areas ( $P_{RR}$ ) | $D \leq 250$ m            | $P_{RR} = 1.0$                 |
|                    |                                                    | $250 < D \leq 500$ m      | $P_{RR} = 0.8$                 |
|                    |                                                    | $500 < D \leq 1000$ m     | $P_{RR} = 0.6$                 |
|                    |                                                    | $1,000 < D \leq 2000$ m   | $P_{RR} = 0.4$                 |
|                    |                                                    | $2,000 < D \leq 5000$ m   | $P_{RR} = 0.2$                 |
|                    |                                                    | $D > 5000$ m              | $P_{RR} = 0.0$                 |
|                    | Accessibility factor ( $F_{ACC}$ )                 | Facilitated accessibility | $F_{ACC} = 1$                  |
|                    |                                                    | Easily accessible         | $F_{ACC} = 0.75$               |
|                    |                                                    | Moderately accessible     | $F_{ACC} = 0.5$                |
|                    |                                                    | Hardly accessible         | $F_{ACC} = 0.25$               |
|                    |                                                    | Not accessible            | $F_{ACC} = 0$                  |

D = Distance from MEL to water bodies (criteria for  $P_R$ ) and residential areas (criteria for  $P_{RR}$ )

**Table S3:** Assessment criteria to the severity index ( $I_s$ ) of scenario S1

| Scenario S1                                                                                                                                                                                                                                                           |        |                                                                                                                                                                                   |        |
|-----------------------------------------------------------------------------------------------------------------------------------------------------------------------------------------------------------------------------------------------------------------------|--------|-----------------------------------------------------------------------------------------------------------------------------------------------------------------------------------|--------|
| Exposure factor for surface waters ( $F_{SUP}$ )*                                                                                                                                                                                                                     |        |                                                                                                                                                                                   |        |
| Distance (D)                                                                                                                                                                                                                                                          |        | Value                                                                                                                                                                             |        |
| $D \leq 100$ m                                                                                                                                                                                                                                                        |        | 1                                                                                                                                                                                 |        |
| $100 < D \leq 5000$ m                                                                                                                                                                                                                                                 |        | $(-0.0002 \times D + 1)$                                                                                                                                                          |        |
| $D > 5000$ m                                                                                                                                                                                                                                                          |        | 0                                                                                                                                                                                 |        |
| Vulnerability factor of the exposed population ( $V_P$ )                                                                                                                                                                                                              |        | Ecological vulnerability factor ( $V_E$ )                                                                                                                                         |        |
| Criteria                                                                                                                                                                                                                                                              | Values | Criteria                                                                                                                                                                          | Values |
| <b>Use of Very Highly Vulnerable Water:</b> Supply water to the population (wells for private use and catchments of water intended for human consumption, which supply more than 50 people or population centers).                                                    | 5      | <b>Very Highly Vulnerable Resources and Ecosystems:</b> Sensitive areas (environmental protection of resources and ecosystems). Surface water bodies with very ecological status. | 5      |
| <b>Highly Vulnerable Water Use:</b> Irrigation (orchards, other crops, and pastures) and other agro-livestock uses (water troughs). Aquaculture, fishing grounds and recreational use (bathing area).                                                                 | 4      | <b>Highly Vulnerable Resources and Ecosystems:</b> Well conserved wetlands not included in the Ramsar Convention or the INHZ. Surface water bodies with a good ecological status. | 4      |
| <b>Use of Vulnerable Water:</b> Recreational use (sport fishing). Water for park irrigation, etc.                                                                                                                                                                     | 3      | <b>Vulnerable Resources and Ecosystems:</b> Surface water bodies with moderate ecological status.                                                                                 | 3      |
| <b>Use of Low Vulnerable Water:</b> Industrial use, generation of energy (for cooling) and other industrial uses, water for irrigation of golf courses, navigation and water transport, etc. Water: Recreational use (sport fishing). Water for park irrigation, etc. | 2      | <b>Low Vulnerable Resources and Ecosystems:</b> Surface water bodies with poor water status.                                                                                      | 2      |
| <b>Use of Water Very Little Vulnerable:</b> Other uses with low exposure.                                                                                                                                                                                             | 1      | <b>Very Low Vulnerable Resources and Ecosystems:</b> Surface water bodies with a bad ecological status.                                                                           | 1      |

\*  $F_{SUP-PO}$  for population and  $F_{SUP-NA}$  for environment

**Table S4:** Assessment criteria of parameters for severity index determination of scenario S3 and S4

| Scenario S3 and S4                                  |                       |                                                                                                                                |                                          |                                                                    |        |
|-----------------------------------------------------|-----------------------|--------------------------------------------------------------------------------------------------------------------------------|------------------------------------------|--------------------------------------------------------------------|--------|
| Amount of substance released into the Environment I |                       | Dangerousness (P)                                                                                                              |                                          | Spread I                                                           |        |
| Criteria                                            | Values                | Criteria                                                                                                                       | Values                                   | Criteria                                                           | Values |
| <b>Very High:</b><br>Greater than 500 tons          | 4                     | <b>Very dangerous:</b><br>Highly flammable/Very toxic/Causes immediate irreversible effects                                    | 4                                        | <b>Very extensive:</b><br>Radius greater than 1 km                 | 4      |
| <b>High:</b><br>Between 50 and 500 tons             | 3                     | <b>Dangerous:</b><br>Explosive/Flammable/Corrosive                                                                             | 3                                        | <b>Extensive:</b> Radius up to 1 km                                | 3      |
| <b>Low:</b> Between 5 and 49 tons                   | 2                     | <b>Slightly dangerous:</b><br>Combustible                                                                                      | 2                                        | <b>Little extensive:</b><br>Radius less than 0.5 km (located area) | 2      |
| <b>Very low:</b><br>Less than 5 tons                | 1                     | <b>Not dangerous:</b><br>Slight and reversible damage                                                                          | 1                                        | <b>Specific area:</b><br>Affected area (delimited area)            | 1      |
| Affected population (V <sub>PO</sub> )              |                       |                                                                                                                                | Environmental quality (V <sub>NA</sub> ) |                                                                    |        |
| Criteria                                            | Values                | Criteria                                                                                                                       | Values                                   | Criteria                                                           | Values |
| <b>Very high:</b> More than 100 people              | 4                     | <b>Very high:</b> Very high damage – indiscriminate exploitation of natural resources, and there is a high level of pollution  | 4                                        |                                                                    |        |
| <b>High:</b> Between 50 and 100 people              | 3                     | <b>High:</b> High damage – high level of exploitation of natural resources, and there is a moderate level of pollution         | 3                                        |                                                                    |        |
| <b>Low:</b> Between 5 and 50 people                 | 2                     | <b>Medium:</b> Moderate damage – moderate level of exploitation of natural resources, and there is a level of slight pollution | 2                                        |                                                                    |        |
| <b>Very low:</b> Less than 5 people                 | 1                     | <b>Low:</b> Minor damage: conservation of natural resources, and there is no contamination                                     | 1                                        |                                                                    |        |
| Severity Index (Is)                                 |                       |                                                                                                                                |                                          |                                                                    |        |
| Criteria                                            | Impact classification | Is value                                                                                                                       |                                          |                                                                    |        |
| 18 ≤ G <sub>PO/NA</sub> ≤ 20                        | Critical              | 5                                                                                                                              |                                          |                                                                    |        |
| 15 ≤ G <sub>PO/NA</sub> ≤ 17                        | Serious               | 4                                                                                                                              |                                          |                                                                    |        |
| 11 ≤ G <sub>PO/NA</sub> ≤ 14                        | Moderate              | 3                                                                                                                              |                                          |                                                                    |        |
| 8 ≤ G <sub>PO/NA</sub> ≤ 10                         | Slight                | 2                                                                                                                              |                                          |                                                                    |        |
| 5 ≤ G <sub>PO/NA</sub> ≤ 7                          | Not relevant          | 1                                                                                                                              |                                          |                                                                    |        |

G<sub>PO/NA</sub> = impact classification for the population (G<sub>PO</sub>) and environment (G<sub>NA</sub>)

**Table S5:** Risk assessment results: scenarios S1 and S2

| Study area               | Id code   | East   | North   | I <sub>r</sub> (S1) | I <sub>s</sub> (S1PO) | I <sub>s</sub> (S1NA) | R <sub>i</sub> (S1PO) | R <sub>i</sub> (S1NA) | I <sub>r</sub> (S2) | I <sub>s</sub> (S2) | R <sub>i</sub> (S2) |
|--------------------------|-----------|--------|---------|---------------------|-----------------------|-----------------------|-----------------------|-----------------------|---------------------|---------------------|---------------------|
| Macuchi                  | MA-TD-01  | 716858 | 9897463 | 2                   | 5                     | 3                     | 10                    | 6                     | 3                   | 3                   | 9                   |
|                          | MA-TD-02  | 716745 | 9897662 | 2                   | 5                     | 3                     | 10                    | 6                     | 2                   | 3                   | 6                   |
|                          | MA-TD-03  | 716760 | 9897533 | 2                   | 5                     | 3                     | 10                    | 6                     | 3                   | 3                   | 9                   |
|                          | MA-TD-04  | 716737 | 9897537 | 2                   | 5                     | 3                     | 10                    | 6                     | 3                   | 3                   | 9                   |
|                          | MA-TD-05  | 716579 | 9897721 | 2                   | 5                     | 3                     | 10                    | 6                     | 2                   | 3                   | 6                   |
|                          | MA-LF-01  | 716048 | 9895083 | 0                   | 4                     | 1                     | 0                     | 0                     | 0                   | 3                   | 0                   |
|                          | MA-LF-02  | 716132 | 9896407 | 0                   | 5                     | 2                     | 0                     | 0                     | 2                   | 3                   | 6                   |
|                          | MA-LF-03  | 716467 | 9899336 | 3                   | 5                     | 3                     | 15                    | 9                     | 3                   | 3                   | 9                   |
|                          | MA-LF-04  | 716502 | 9897876 | 2                   | 5                     | 3                     | 10                    | 6                     | 2                   | 3                   | 6                   |
| Tenguel – Ponce Enríquez | TPE-LF-01 | 643678 | 9661435 | 3                   | 4                     | 3                     | 12                    | 9                     | 1                   | 3                   | 3                   |
|                          | TPE-LF-02 | 643709 | 9661535 | 3                   | 4                     | 3                     | 12                    | 9                     | 1                   | 3                   | 3                   |
|                          | TPE-LF-03 | 643560 | 9661196 | 0                   | 4                     | 3                     | 0                     | 0                     | 1                   | 3                   | 3                   |
|                          | TPE-LF-04 | 646522 | 9668118 | 3                   | 3                     | 3                     | 9                     | 9                     | 0                   | 3                   | 0                   |
|                          | TPE-LF-05 | 645353 | 9667555 | 2                   | 4                     | 3                     | 8                     | 6                     | 1                   | 3                   | 3                   |
|                          | TPE-LF-06 | 641224 | 9662125 | 0                   | 4                     | 3                     | 0                     | 0                     | 1                   | 3                   | 3                   |
|                          | TPE-LF-07 | 641445 | 9662122 | 2                   | 4                     | 3                     | 8                     | 6                     | 2                   | 3                   | 6                   |
|                          | TPE-LF-08 | 641307 | 9662547 | 2                   | 4                     | 3                     | 8                     | 6                     | 1                   | 3                   | 3                   |
|                          | TPE-LF-09 | 641489 | 9662514 | 2                   | 4                     | 3                     | 8                     | 6                     | 2                   | 3                   | 6                   |
|                          | TPE-LF-10 | 641593 | 9662649 | 2                   | 4                     | 3                     | 8                     | 6                     | 1                   | 3                   | 3                   |
|                          | TPE-LF-11 | 641335 | 9662225 | 3                   | 4                     | 3                     | 12                    | 9                     | 2                   | 3                   | 6                   |
|                          | TPE-LF-12 | 650453 | 9664176 | 2                   | 4                     | 3                     | 8                     | 6                     | 2                   | 3                   | 6                   |
|                          | TPE-LF-13 | 650277 | 9663678 | 2                   | 4                     | 3                     | 8                     | 6                     | 2                   | 3                   | 6                   |
|                          | TPE-LF-14 | 649734 | 9663618 | 2                   | 4                     | 3                     | 8                     | 6                     | 2                   | 3                   | 6                   |
|                          | TPE-LF-15 | 649810 | 9663475 | 2                   | 4                     | 3                     | 8                     | 6                     | 2                   | 3                   | 6                   |
|                          | TPE-LF-16 | 650031 | 9663562 | 2                   | 4                     | 3                     | 8                     | 6                     | 2                   | 3                   | 6                   |
|                          | TPE-LF-17 | 655420 | 9657012 | 3                   | 3                     | 3                     | 9                     | 9                     | 1                   | 3                   | 3                   |
|                          | TPE-LF-18 | 657404 | 9659215 | 1                   | 3                     | 3                     | 3                     | 3                     | 0                   | 3                   | 0                   |
|                          | TPE-LF-19 | 641239 | 9663357 | 1                   | 4                     | 3                     | 4                     | 3                     | 2                   | 3                   | 6                   |
|                          | TPE-LF-20 | 642273 | 9663481 | 1                   | 4                     | 3                     | 4                     | 3                     | 2                   | 3                   | 6                   |
|                          | TPE-LF-21 | 642325 | 9663468 | 1                   | 4                     | 3                     | 4                     | 3                     | 2                   | 3                   | 6                   |
|                          | TPE-LF-22 | 642732 | 9663722 | 2                   | 4                     | 3                     | 8                     | 6                     | 1                   | 3                   | 3                   |
|                          | TPE-LF-23 | 642724 | 9663776 | 3                   | 4                     | 3                     | 12                    | 9                     | 1                   | 3                   | 3                   |
|                          | TPE-LF-24 | 642807 | 9663837 | 2                   | 4                     | 3                     | 8                     | 6                     | 1                   | 3                   | 3                   |
|                          | TPE-LF-25 | 642874 | 9663722 | 2                   | 4                     | 3                     | 8                     | 6                     | 1                   | 3                   | 3                   |
|                          | TPE-LF-26 | 643068 | 9663707 | 2                   | 4                     | 3                     | 8                     | 6                     | 1                   | 3                   | 3                   |
|                          | TPE-LF-27 | 643198 | 9663649 | 3                   | 4                     | 3                     | 12                    | 9                     | 1                   | 3                   | 3                   |
|                          | TPE-LF-28 | 647877 | 9660680 | 2                   | 4                     | 3                     | 8                     | 6                     | 1                   | 3                   | 3                   |
|                          | TPE-LF-29 | 647716 | 9660577 | 2                   | 4                     | 3                     | 8                     | 6                     | 1                   | 3                   | 3                   |
|                          | TPE-LF-30 | 642982 | 9664015 | 3                   | 4                     | 3                     | 12                    | 9                     | 1                   | 3                   | 3                   |
|                          | TPE-LF-31 | 642891 | 9663993 | 3                   | 4                     | 3                     | 12                    | 9                     | 1                   | 3                   | 3                   |
|                          | TPE-LF-32 | 642960 | 9663712 | 2                   | 4                     | 3                     | 8                     | 6                     | 1                   | 3                   | 3                   |
|                          | TPE-LF-33 | 642882 | 9663916 | 2                   | 4                     | 3                     | 8                     | 6                     | 1                   | 3                   | 3                   |
|                          | TPE-LF-34 | 644583 | 9660613 | 0                   | 4                     | 3                     | 0                     | 0                     | 2                   | 3                   | 6                   |
| Puyango                  | PU-TD-01  | 651046 | 9596539 | 1                   | 4                     | 3                     | 4                     | 3                     | 2                   | 3                   | 6                   |
|                          | PU-TD-02  | 650256 | 9597080 | 1                   | 4                     | 3                     | 4                     | 3                     | 2                   | 3                   | 6                   |
|                          | PU-TD-03  | 651372 | 9594347 | 2                   | 4                     | 3                     | 8                     | 6                     | 2                   | 3                   | 6                   |
|                          | PU-TD-04  | 650368 | 9596742 | 1                   | 4                     | 3                     | 4                     | 3                     | 2                   | 3                   | 6                   |
|                          | PU-TD-05  | 650972 | 9593650 | 3                   | 4                     | 3                     | 12                    | 9                     | 2                   | 3                   | 6                   |
|                          | PU-TD-06  | 651081 | 9593996 | 2                   | 4                     | 3                     | 8                     | 6                     | 2                   | 3                   | 6                   |
|                          | PU-TD-07  | 649539 | 9597384 | 2                   | 4                     | 3                     | 8                     | 6                     | 2                   | 3                   | 6                   |
|                          | PU-TD-08  | 651016 | 9586805 | 2                   | 4                     | 3                     | 8                     | 6                     | 2                   | 3                   | 6                   |
|                          | PU-TD-09  | 652160 | 9588026 | 2                   | 4                     | 3                     | 8                     | 6                     | 2                   | 3                   | 6                   |
|                          | PU-TD-10  | 651457 | 9587486 | 3                   | 4                     | 3                     | 12                    | 9                     | 2                   | 3                   | 6                   |
|                          | PU-TD-11  | 650914 | 9586435 | 2                   | 4                     | 3                     | 8                     | 6                     | 2                   | 3                   | 6                   |
|                          | PU-TD-12  | 650413 | 9595556 | 2                   | 4                     | 3                     | 8                     | 6                     | 2                   | 3                   | 6                   |

MA = Macuchi; TPE = Tenguel – Ponce Enríquez; PU = Puyango; LF = Landfill; TD = Tailing Deposit

**Table S6:** Risk assessment results: scenarios S3 and S4

| Study area               | ID        | East   | North   | I <sub>r</sub> (S3) | I <sub>s</sub> (S3PO) | I <sub>s</sub> (S3NA) | R <sub>r</sub> (S3PO) | R <sub>r</sub> (S3NA) | I <sub>r</sub> (S4) | I <sub>s</sub> (S4PO) | I <sub>s</sub> (S4NA) | R <sub>r</sub> (S4PO) | R <sub>r</sub> (S4NA) |
|--------------------------|-----------|--------|---------|---------------------|-----------------------|-----------------------|-----------------------|-----------------------|---------------------|-----------------------|-----------------------|-----------------------|-----------------------|
| Macuchi                  | MA-ME-01  | 714237 | 9892641 | 3                   | 3                     | 2                     | 9                     | 6                     | 3                   | 2                     | 2                     | 6                     | 6                     |
|                          | MA-ME-02  | 716139 | 9896402 | 3                   | 5                     | 5                     | 15                    | 15                    | 3                   | 4                     | 4                     | 12                    | 12                    |
|                          | MA-ME-03  | 716362 | 9897155 | 3                   | 3                     | 2                     | 9                     | 6                     | 3                   | 2                     | 2                     | 6                     | 6                     |
|                          | MA-ME-04  | 716478 | 9897193 | 3                   | 5                     | 5                     | 15                    | 15                    | 3                   | 4                     | 4                     | 12                    | 12                    |
|                          | MA-ME-05  | 716476 | 9897187 | 3                   | 3                     | 2                     | 9                     | 6                     | 3                   | 2                     | 2                     | 6                     | 6                     |
| Tenguel - Ponce Enriquez | TPE-ME-01 | 643853 | 9661616 | 3                   | 3                     | 2                     | 9                     | 6                     | 3                   | 2                     | 1                     | 6                     | 3                     |
|                          | TPE-ME-02 | 643844 | 9661626 | 3                   | 3                     | 2                     | 9                     | 6                     | 3                   | 2                     | 1                     | 6                     | 3                     |
|                          | TPE-ME-03 | 643714 | 9661529 | 3                   | 3                     | 2                     | 9                     | 6                     | 3                   | 2                     | 1                     | 6                     | 3                     |
|                          | TPE-ME-04 | 643571 | 9661168 | 3                   | 3                     | 2                     | 9                     | 6                     | 3                   | 2                     | 1                     | 6                     | 3                     |
|                          | TPE-ME-05 | 649578 | 9666117 | 3                   | 3                     | 2                     | 9                     | 6                     | 3                   | 2                     | 1                     | 6                     | 3                     |
|                          | TPE-ME-06 | 646527 | 9668099 | 3                   | 3                     | 2                     | 9                     | 6                     | 3                   | 2                     | 1                     | 6                     | 3                     |
|                          | TPE-ME-07 | 646515 | 9668106 | 3                   | 3                     | 2                     | 9                     | 6                     | 3                   | 2                     | 1                     | 6                     | 3                     |
|                          | TPE-ME-08 | 646533 | 9668070 | 3                   | 3                     | 2                     | 9                     | 6                     | 3                   | 2                     | 1                     | 6                     | 3                     |
|                          | TPE-ME-09 | 645395 | 9667485 | 3                   | 3                     | 2                     | 9                     | 6                     | 3                   | 2                     | 1                     | 6                     | 3                     |
|                          | TPE-ME-10 | 646341 | 9668247 | 3                   | 5                     | 5                     | 15                    | 15                    | 3                   | 4                     | 4                     | 12                    | 12                    |
|                          | TPE-ME-11 | 641501 | 9662347 | 3                   | 3                     | 2                     | 9                     | 6                     | 3                   | 2                     | 1                     | 6                     | 3                     |
|                          | TPE-ME-12 | 641510 | 9662344 | 3                   | 3                     | 2                     | 9                     | 6                     | 3                   | 2                     | 1                     | 6                     | 3                     |
|                          | TPE-ME-13 | 641621 | 9662414 | 3                   | 3                     | 2                     | 9                     | 6                     | 3                   | 2                     | 1                     | 6                     | 3                     |
|                          | TPE-ME-14 | 641671 | 9662359 | 3                   | 3                     | 2                     | 9                     | 6                     | 3                   | 2                     | 1                     | 6                     | 3                     |
|                          | TPE-ME-15 | 641715 | 9662389 | 3                   | 3                     | 2                     | 9                     | 6                     | 3                   | 2                     | 1                     | 6                     | 3                     |
|                          | TPE-ME-16 | 641617 | 9662347 | 3                   | 3                     | 2                     | 9                     | 6                     | 3                   | 2                     | 1                     | 6                     | 3                     |
|                          | TPE-ME-17 | 640453 | 9661761 | 3                   | 3                     | 2                     | 9                     | 6                     | 3                   | 2                     | 1                     | 6                     | 3                     |
|                          | TPE-ME-18 | 640439 | 9661783 | 3                   | 3                     | 2                     | 9                     | 6                     | 3                   | 2                     | 1                     | 6                     | 3                     |
|                          | TPE-ME-19 | 640417 | 9661782 | 3                   | 3                     | 2                     | 9                     | 6                     | 3                   | 2                     | 1                     | 6                     | 3                     |
|                          | TPE-ME-20 | 641430 | 9662626 | 3                   | 3                     | 2                     | 9                     | 6                     | 3                   | 2                     | 1                     | 6                     | 3                     |
|                          | TPE-ME-21 | 641311 | 9662563 | 3                   | 3                     | 2                     | 9                     | 6                     | 3                   | 2                     | 1                     | 6                     | 3                     |
|                          | TPE-ME-22 | 641561 | 9662506 | 3                   | 3                     | 2                     | 9                     | 6                     | 3                   | 2                     | 1                     | 6                     | 3                     |
|                          | TPE-ME-23 | 641553 | 9662442 | 3                   | 3                     | 2                     | 9                     | 6                     | 3                   | 2                     | 1                     | 6                     | 3                     |
|                          | TPE-ME-24 | 641296 | 9662587 | 3                   | 3                     | 2                     | 9                     | 6                     | 3                   | 2                     | 1                     | 6                     | 3                     |
|                          | TPE-ME-25 | 641333 | 9662194 | 3                   | 3                     | 2                     | 9                     | 6                     | 3                   | 2                     | 1                     | 6                     | 3                     |
|                          | TPE-ME-26 | 653013 | 9663434 | 3                   | 3                     | 2                     | 9                     | 6                     | 3                   | 2                     | 1                     | 6                     | 3                     |
|                          | TPE-ME-27 | 653148 | 9663515 | 3                   | 3                     | 2                     | 9                     | 6                     | 3                   | 2                     | 1                     | 6                     | 3                     |
|                          | TPE-ME-28 | 648472 | 9666352 | 3                   | 3                     | 2                     | 9                     | 6                     | 3                   | 2                     | 1                     | 6                     | 3                     |
|                          | TPE-ME-29 | 649031 | 9666848 | 3                   | 3                     | 2                     | 9                     | 6                     | 3                   | 2                     | 1                     | 6                     | 3                     |
|                          | TPE-ME-30 | 651593 | 9662493 | 3                   | 5                     | 5                     | 15                    | 15                    | 3                   | 4                     | 4                     | 12                    | 12                    |
|                          | TPE-ME-31 | 651482 | 9662444 | 3                   | 5                     | 5                     | 15                    | 15                    | 3                   | 4                     | 4                     | 12                    | 12                    |
|                          | TPE-ME-32 | 651452 | 9662452 | 3                   | 3                     | 2                     | 9                     | 6                     | 3                   | 2                     | 1                     | 6                     | 3                     |
|                          | TPE-ME-33 | 651412 | 9662420 | 3                   | 5                     | 5                     | 15                    | 15                    | 3                   | 4                     | 4                     | 12                    | 12                    |
|                          | TPE-ME-34 | 651341 | 9662353 | 3                   | 3                     | 2                     | 9                     | 6                     | 3                   | 2                     | 1                     | 6                     | 3                     |
|                          | TPE-ME-35 | 651333 | 9662327 | 3                   | 3                     | 2                     | 9                     | 6                     | 3                   | 2                     | 1                     | 6                     | 3                     |
|                          | TPE-ME-36 | 651311 | 9662268 | 3                   | 3                     | 2                     | 9                     | 6                     | 3                   | 2                     | 1                     | 6                     | 3                     |
|                          | TPE-ME-37 | 649806 | 9663466 | 3                   | 3                     | 2                     | 9                     | 6                     | 3                   | 2                     | 1                     | 6                     | 3                     |
|                          | TPE-ME-38 | 650032 | 9663530 | 3                   | 3                     | 2                     | 9                     | 6                     | 3                   | 2                     | 1                     | 6                     | 3                     |
|                          | TPE-ME-39 | 648768 | 9665014 | 3                   | 3                     | 2                     | 9                     | 6                     | 3                   | 2                     | 1                     | 6                     | 3                     |
|                          | TPE-ME-40 | 648882 | 9665063 | 3                   | 5                     | 5                     | 15                    | 15                    | 3                   | 4                     | 4                     | 12                    | 12                    |
|                          | TPE-ME-41 | 648962 | 9664784 | 3                   | 5                     | 5                     | 15                    | 15                    | 3                   | 4                     | 4                     | 12                    | 12                    |
|                          | TPE-ME-42 | 649717 | 9663608 | 3                   | 3                     | 2                     | 9                     | 6                     | 3                   | 2                     | 1                     | 6                     | 3                     |
|                          | TPE-ME-43 | 649732 | 9663577 | 3                   | 5                     | 5                     | 15                    | 15                    | 3                   | 4                     | 4                     | 12                    | 12                    |
|                          | TPE-ME-44 | 649759 | 9663583 | 3                   | 5                     | 5                     | 15                    | 15                    | 3                   | 4                     | 4                     | 12                    | 12                    |
|                          | TPE-ME-45 | 650024 | 9663525 | 3                   | 5                     | 5                     | 15                    | 15                    | 3                   | 4                     | 4                     | 12                    | 12                    |
|                          | TPE-ME-46 | 650027 | 9663547 | 3                   | 3                     | 2                     | 9                     | 6                     | 3                   | 2                     | 1                     | 6                     | 3                     |
|                          | TPE-ME-47 | 655993 | 9657437 | 3                   | 3                     | 2                     | 9                     | 6                     | 3                   | 2                     | 1                     | 6                     | 3                     |
|                          | TPE-ME-48 | 655421 | 9657015 | 3                   | 3                     | 2                     | 9                     | 6                     | 3                   | 2                     | 1                     | 6                     | 3                     |
|                          | TPE-ME-49 | 642703 | 9663716 | 3                   | 3                     | 2                     | 9                     | 6                     | 3                   | 2                     | 1                     | 6                     | 3                     |
|                          | TPE-ME-50 | 642817 | 9663824 | 3                   | 5                     | 5                     | 15                    | 15                    | 3                   | 4                     | 4                     | 12                    | 12                    |
|                          | TPE-ME-51 | 642886 | 9663709 | 3                   | 5                     | 5                     | 15                    | 15                    | 3                   | 4                     | 4                     | 12                    | 12                    |
|                          | TPE-ME-52 | 643070 | 9663699 | 3                   | 5                     | 5                     | 15                    | 15                    | 3                   | 4                     | 4                     | 12                    | 12                    |



|         |            |        |         |   |   |   |    |    |   |   |   |    |    |
|---------|------------|--------|---------|---|---|---|----|----|---|---|---|----|----|
|         | TPE-ME-53  | 643192 | 9663638 | 3 | 3 | 2 | 9  | 6  | 3 | 2 | 1 | 6  | 3  |
|         | TPE-ME-54  | 641252 | 9663342 | 3 | 5 | 5 | 15 | 15 | 3 | 4 | 4 | 12 | 12 |
|         | TPE-ME-55  | 643069 | 9663702 | 3 | 3 | 2 | 9  | 6  | 3 | 2 | 1 | 6  | 3  |
|         | TPE-ME-56  | 647886 | 9660643 | 3 | 3 | 2 | 9  | 6  | 3 | 2 | 1 | 6  | 3  |
|         | TPE-ME-57  | 647681 | 9660548 | 3 | 3 | 2 | 9  | 6  | 3 | 2 | 1 | 6  | 3  |
|         | TPE-ME-58  | 647699 | 9660557 | 3 | 5 | 5 | 15 | 15 | 3 | 4 | 4 | 12 | 12 |
|         | TPE-ME-59  | 642973 | 9663988 | 3 | 3 | 2 | 9  | 6  | 3 | 2 | 1 | 6  | 3  |
|         | TPE-ME-60  | 642959 | 9663694 | 3 | 3 | 2 | 9  | 6  | 3 | 2 | 1 | 6  | 3  |
|         | TPE-ME-61  | 642877 | 9663891 | 3 | 3 | 2 | 9  | 6  | 3 | 2 | 1 | 6  | 3  |
|         | TPE-ME-62  | 642940 | 9664029 | 3 | 3 | 2 | 9  | 6  | 3 | 2 | 1 | 6  | 3  |
|         | TPE-ME-63  | 642918 | 9663973 | 3 | 3 | 2 | 9  | 6  | 3 | 2 | 1 | 6  | 3  |
|         | TPE-ME-64  | 642948 | 9663702 | 3 | 3 | 2 | 9  | 6  | 3 | 2 | 1 | 6  | 3  |
|         | TPE-ABI-01 | 650450 | 9664243 | 3 | 3 | 2 | 9  | 6  | 3 | 2 | 1 | 6  | 3  |
|         | TPE-ABI-02 | 650588 | 9664124 | 3 | 3 | 2 | 9  | 6  | 3 | 2 | 1 | 6  | 3  |
|         | TPE-ABI-03 | 650447 | 9664162 | 3 | 3 | 2 | 9  | 6  | 3 | 2 | 1 | 6  | 3  |
|         | TPE-ABI-04 | 650308 | 9663673 | 3 | 3 | 2 | 9  | 6  | 3 | 2 | 1 | 6  | 3  |
|         | TPE-ABI-05 | 649723 | 9663579 | 3 | 3 | 2 | 9  | 6  | 3 | 2 | 1 | 6  | 3  |
|         | TPE-ABI-06 | 657406 | 9659216 | 3 | 3 | 2 | 9  | 6  | 3 | 2 | 1 | 6  | 3  |
|         | TPE-ABI-07 | 641264 | 9663325 | 3 | 3 | 2 | 9  | 6  | 3 | 2 | 1 | 6  | 3  |
|         | TPE-ABI-08 | 642309 | 9663464 | 3 | 3 | 2 | 9  | 6  | 3 | 2 | 1 | 6  | 3  |
|         | TPE-ABI-09 | 641634 | 9663871 | 3 | 3 | 2 | 9  | 6  | 3 | 2 | 1 | 6  | 3  |
|         | TPE-ABI-10 | 642757 | 9663697 | 3 | 3 | 2 | 9  | 6  | 3 | 2 | 1 | 6  | 3  |
|         | TPE-ABI-11 | 641649 | 9663874 | 3 | 3 | 2 | 9  | 6  | 3 | 2 | 1 | 6  | 3  |
|         | TPE-ABI-12 | 641665 | 9663904 | 3 | 3 | 2 | 9  | 6  | 3 | 2 | 1 | 6  | 3  |
|         | TPE-ABI-13 | 642737 | 9663724 | 3 | 3 | 2 | 9  | 6  | 3 | 2 | 1 | 6  | 3  |
| Puyango | PU-MG-01   | 654237 | 9592641 | 3 | 5 | 5 | 15 | 15 | 3 | 4 | 4 | 12 | 12 |
|         | PU-MG-02   | 654252 | 9592554 | 3 | 5 | 5 | 15 | 15 | 3 | 4 | 4 | 12 | 12 |
|         | PU-MG-03   | 654237 | 9592641 | 3 | 5 | 5 | 15 | 15 | 3 | 4 | 4 | 12 | 12 |
|         | PU-MG-04   | 654418 | 9593831 | 3 | 5 | 5 | 15 | 15 | 3 | 4 | 4 | 12 | 12 |
|         | PU-MG-05   | 694557 | 9593532 | 3 | 5 | 5 | 15 | 15 | 3 | 4 | 4 | 12 | 12 |
|         | PU-MG-06   | 655181 | 9597272 | 3 | 5 | 5 | 15 | 15 | 3 | 4 | 4 | 12 | 12 |
|         | PU-MG-07   | 651929 | 9596624 | 3 | 5 | 5 | 15 | 15 | 3 | 4 | 4 | 12 | 12 |
|         | PU-MG-08   | 651744 | 9598569 | 3 | 5 | 5 | 15 | 15 | 3 | 4 | 4 | 12 | 12 |
|         | PU-MG-09   | 648266 | 9599340 | 3 | 5 | 5 | 15 | 15 | 3 | 4 | 4 | 12 | 12 |
|         | PU-MG-10   | 633281 | 9591926 | 3 | 5 | 5 | 15 | 15 | 3 | 4 | 4 | 12 | 12 |
|         | PU-MG-11   | 653325 | 9591957 | 3 | 5 | 5 | 15 | 15 | 3 | 4 | 4 | 12 | 12 |
|         | PU-MG-12   | 655137 | 9587755 | 3 | 5 | 5 | 15 | 15 | 3 | 4 | 4 | 12 | 12 |
|         | PU-MG-13   | 654303 | 9588317 | 3 | 5 | 5 | 15 | 15 | 3 | 4 | 4 | 12 | 12 |
|         | PU-MG-14   | 655369 | 9587736 | 3 | 5 | 5 | 15 | 15 | 3 | 4 | 4 | 12 | 12 |
|         | PU-MPP-01  | 653851 | 9596547 | 3 | 5 | 5 | 15 | 15 | 3 | 4 | 4 | 12 | 12 |
|         | PU-MPP-02  | 653712 | 9596356 | 3 | 5 | 5 | 15 | 15 | 3 | 4 | 4 | 12 | 12 |
|         | PU-MPP-03  | 652424 | 9603129 | 3 | 5 | 5 | 15 | 15 | 3 | 4 | 4 | 12 | 12 |
|         | PU-MPP-04  | 648463 | 9604985 | 3 | 5 | 5 | 15 | 15 | 3 | 4 | 4 | 12 | 12 |
|         | PU-MPP-05  | 655648 | 9594476 | 3 | 5 | 5 | 15 | 15 | 3 | 4 | 4 | 12 | 12 |
|         | PU-MPP-06  | 655677 | 9594316 | 3 | 5 | 5 | 15 | 15 | 3 | 4 | 4 | 12 | 12 |
|         | PU-MPP-07  | 657092 | 9594960 | 3 | 5 | 5 | 15 | 15 | 3 | 4 | 4 | 12 | 12 |
|         | PU-MPP-08  | 656309 | 9592941 | 3 | 5 | 5 | 15 | 15 | 3 | 4 | 4 | 12 | 12 |
|         | PU-MPP-09  | 655005 | 9592610 | 3 | 5 | 5 | 15 | 15 | 3 | 4 | 4 | 12 | 12 |
|         | PU-MPP-10  | 650948 | 9586396 | 3 | 5 | 5 | 15 | 15 | 3 | 4 | 4 | 12 | 12 |
|         | PU-MPP-11  | 654362 | 9588079 | 3 | 5 | 5 | 15 | 15 | 3 | 4 | 4 | 12 | 12 |
|         | PU-AT-01   | 651680 | 9588167 | 3 | 5 | 5 | 15 | 15 | 3 | 4 | 4 | 12 | 12 |
|         | PU-AT-02   | 650462 | 9584615 | 3 | 5 | 5 | 15 | 15 | 3 | 4 | 4 | 12 | 12 |
|         | PU-AT-03   | 618539 | 9576745 | 3 | 5 | 5 | 15 | 15 | 3 | 4 | 4 | 12 | 12 |
|         | PU-QR-01   | 646914 | 9606952 | 3 | 5 | 5 | 15 | 15 | 3 | 4 | 4 | 12 | 12 |
|         | PU-QR-02   | 621749 | 9579910 | 3 | 5 | 5 | 15 | 15 | 3 | 4 | 4 | 12 | 12 |

MA = Macuchi; TPE = Tenguel – Ponce Enriquez; PU = Puyango; ME = Mine entrance; ABI = Abandoned infrastructure; MG = Mining gallery (Mine); MPP = Mineral processing plant; AT = Alluvial terrace; QR = Quarry

## References

1. MAE-PRAS *Programa de Reparación Ambiental Y Social - Plan de Reparación Integral Macuchi*; 2015; Vol. I;
2. Tarras-Wahlberg, N.H.; Flachier, A.; Fredriksson, G.; Lane, S.; Lundberg, B.; Sangfors, O. Environmental Impact of Small-Scale and Artisanal Gold Mining in Southern Ecuador. *Ambio* **2000**, 29, 484–491, doi:10.1579/0044-7447-29.8.484.
3. Appleton, J.D.; Williams, T.M.; Orbea, H.; Carrasco, M. Fluvial Contamination Associated with Artisanal Gold Mining in the Ponce Enríquez, Portovelo-Zaruma and Nambija Areas, Ecuador. *Water, Air, and Soil Pollution* **2001**, 131, 19–39, doi:10.1023/A:1011965430757.
4. Carling, G.T.; Diaz, X.; Ponce, M.; Perez, L.; Nasimba, L.; Pazmino, E.; Rudd, A.; Merugu, S.; Fernandez, D.P.; Gale, B.K.; et al. Particulate and Dissolved Trace Element Concentrations in Three Southern Ecuador Rivers Impacted by Artisanal Gold Mining. *Water, Air, and Soil Pollution* **2013**, 224, doi:10.1007/s11270-012-1415-y.
5. Sierra, C.; Ruíz-Barzola, O.; Menéndez, M.; Demey, J.R.; Vicente-Villardón, J.L. Geochemical Interactions Study in Surface River Sediments at an Artisanal Mining Area by Means of Canonical (MANOVA)-Biplot. *Journal of Geochemical Exploration* **2017**, 175, 72–81, doi:10.1016/j.gexplo.2017.01.002.
6. TULSMA *Texto Unificado de Legislación Secundaria de Medio Ambiente Norma De Calidad Ambiental Del Recurso Suelo Y Criterios De Remediación Para Suelos Contaminados*; 2015;
